# Supplementary material
Source: PubMed Central journal article supplement (PMC7927837)
Supplement: AAC.01429-20-s0001.pdf [file AAC.01429-20-s0001.pdf]

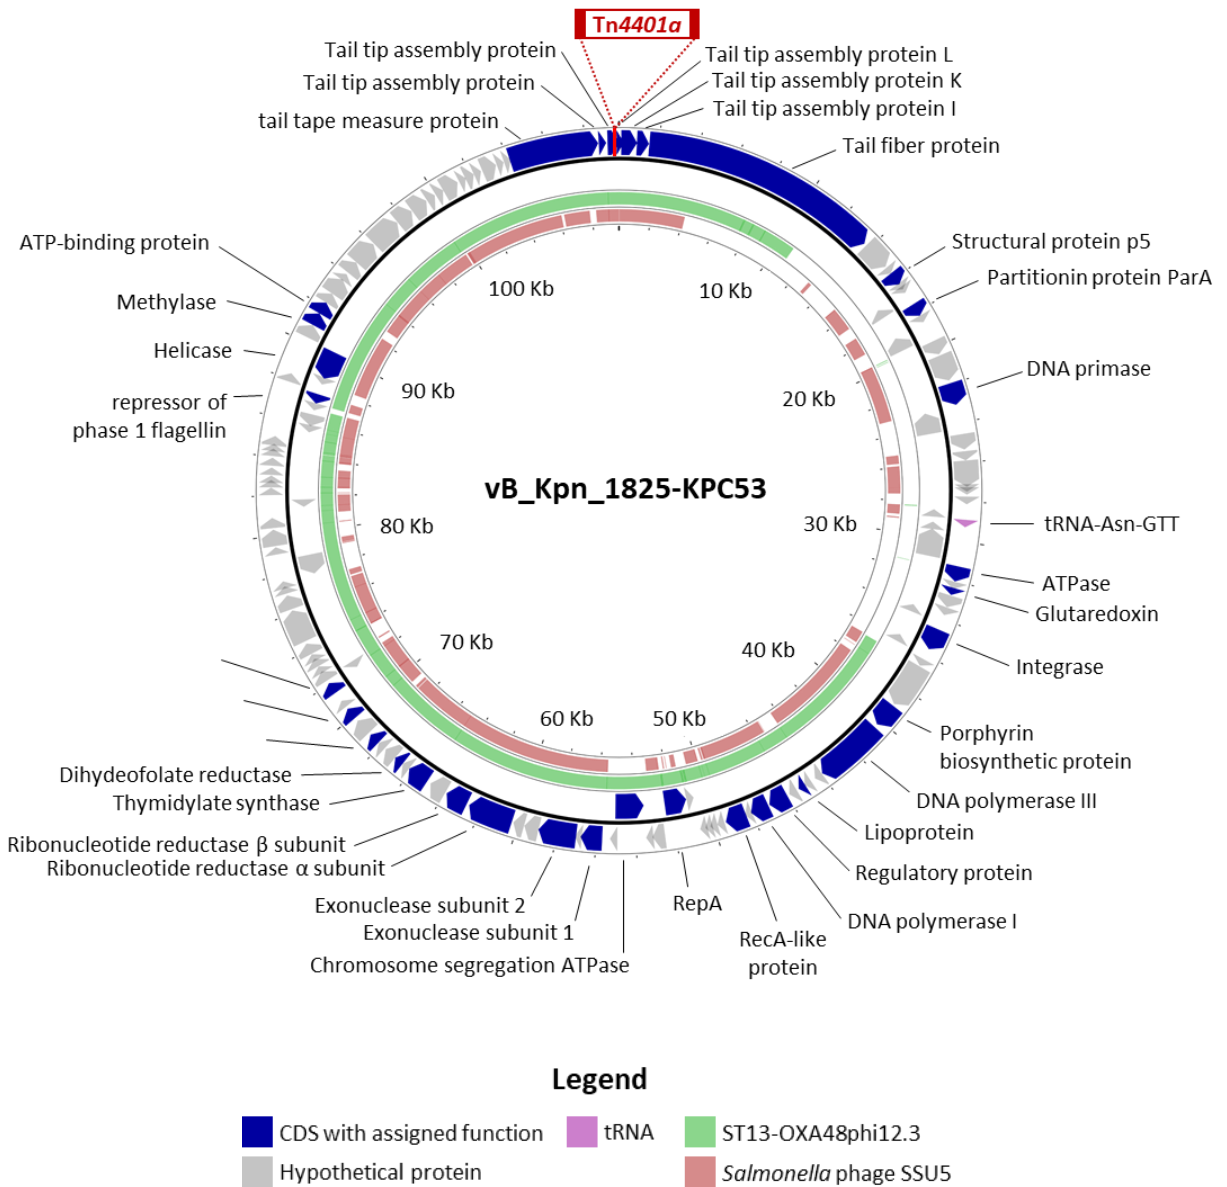

**Figure S1.** Physical map of the *vb\_Kpn\_1825* plasmid prophage and comparison with closely related elements. The circles, from the outermost to the innermost, show: (i) coding DNA sequences (CDS) encoded on the plus and minus DNA strands; (ii) sequence alignment with the *K. pneumoniae* prophage ST13-OXA48phi12.3; (iii) sequence alignment with the *S. enterica* phage SSU5. Genes encoding proteins of known functions are in different colors, as detailed in the legend.

|        |                                                                                                     |     |
|--------|-----------------------------------------------------------------------------------------------------|-----|
| KPC-3  | <u>MSLYRRLLVLLSCLSWPLAGFSATALTNLVAEPFAKLEQDFGGSIGVYAMDTGSGATVSYR</u>                                | 60  |
| KPC-2  | MSLYRRLLVLLSCLSWPLAGFSATALTNLVAEPFAKLEQDFGGSIGVYAMDTGSGATVSYR                                       | 60  |
| KPC-40 | MSLYRRLLVLLSCLSWPLAGFSATALTNLVAEPFAKLEQDFGGSIGVYAMDTGSGATVSYR                                       | 60  |
| KPC-53 | MSLYRRLLVLLSCLSWPLAGFSATALTNLVAEPFAKLEQDFGGSIGVYAMDTGSGATVSYR                                       | 60  |
| KPC-25 | MSLYRRLLVLLSCLSWPLAGFSATALTNLVAEPFAKLEQDFGGSIGVYAMDTGSGATVSYR                                       | 60  |
|        | *****                                                                                               |     |
| KPC-3  | AERFPLCSSFKGFLLAAVLAARSQQQAGLLDTPIRYGKNALVPWSPISEKYLTGTMVAE                                         | 120 |
| KPC-2  | AERFPLCSSFKGFLLAAVLAARSQQQAGLLDTPIRYGKNALVPWSPISEKYLTGTMVAE                                         | 120 |
| KPC-40 | AERFPLCSSFKGFLLAAVLAARSQQQAGLLDTPIRYGKNALVPWSPISEKYLTGTMVAE                                         | 120 |
| KPC-53 | AERFPLCSSFKGFLLAAVLAARSQQQAGLLDTPIRYGKNALVPWSPISEKYLTGTMVAE                                         | 120 |
| KPC-25 | AERFPLCSSFKGFLLAAVLAARSQQQAGLLDTPIRYGKNALVPWSPISEKYLTGTMVAE                                         | 120 |
|        | *****                                                                                               |     |
| KPC-3  | LSAAAVQYSDNAAANLLLKELGGPAGLTAFMRSIGD <sup>T</sup> FRLLDRWELE--LNSAIPGDARD                           | 178 |
| KPC-2  | LSAAAVQYSDNAAANLLLKELGGPAGLTAFMRSIGD <sup>T</sup> FRLLDRWELE--LNSAIPGDARD                           | 178 |
| KPC-40 | LSAAAVQYSDNAAANLLLKELGGPAGLTAFMRSIGD <sup>T</sup> FRLLDRWELELELNSAIPGDARD                           | 180 |
| KPC-53 | LSAAAVQYSDNAAANLLLKELGGPAGLTAFMRSIGD <sup>T</sup> FRLLDRWELELELNSAIPGDARD                           | 180 |
| KPC-25 | LSAAAVQYSDNAAANLLLKELGGPAGLTAFMRSIGD <sup>T</sup> FRLLDRWELELELNSAIPGDARD                           | 180 |
|        | *****                                                                                               |     |
| KPC-3  | TSSPRAVTESLQKLT <sup>L</sup> GSALAAPQRQQFVDWLKGNTTGNHRIRA <sup>A</sup> VPADWAVGDKTGT <sup>C</sup> G | 238 |
| KPC-2  | TSSPRAVTESLQKLT <sup>L</sup> GSALAAPQRQQFVDWLKGNTTGNHRIRA <sup>A</sup> VPADWAVGDKTGT <sup>C</sup> G | 238 |
| KPC-40 | TSSPRAVTESLQKLT <sup>L</sup> GSALAAPQRQQFVDWLKGNTTGNHRIRA <sup>A</sup> VPADWAVGDKTGT <sup>C</sup> G | 240 |
| KPC-53 | TSSPRAVTESLQKLT <sup>L</sup> GSALAAPQRQQFVDWLKGNTTGNHRIRA <sup>A</sup> VPADWAVGDKTGT <sup>C</sup> G | 240 |
| KPC-25 | TSSPRAVTESLQKLT <sup>L</sup> GSALAAPQRQQFVDWLKGNTTGNHRIRA <sup>A</sup> VPADWAVGDKTGT <sup>C</sup> G | 240 |
|        | *****                                                                                               |     |
| KPC-3  | VYGTANDYAVVWPTGRAPIVLAVYTRAPNKDDK <sup>Y</sup> SEAVIAAAARLAL <sup>E</sup> GLGVNGQ                   | 293 |
| KPC-2  | VYGTANDYAVVWPTGRAPIVLAVYTRAPNKDDK <sup>H</sup> SEAVIAAAARLAL <sup>E</sup> GLGVNGQ                   | 293 |
| KPC-40 | VYGSANDYAVVWPTGRAPIVLAVYTRAPNKDDK <sup>Y</sup> SEAVIAAAARLAL <sup>E</sup> GLGVNGQ                   | 295 |
| KPC-53 | VYGTANDYAVVWPTGRAPIVLAVYTRAPNKDDK <sup>Y</sup> SEAVIAAAARLAL <sup>E</sup> GLGVNGQ                   | 295 |
| KPC-25 | VYGTANDYAVVWPTGRAPIVLAVYTRAPNKDDK <sup>H</sup> SEAVIAAAARLAL <sup>E</sup> GLGVNGQ                   | 295 |
|        | ***.*****.*****                                                                                     |     |

**Figure S2.** Alignment of relevant KPC variants. KPC-40 confers reduced susceptibility to CZA and susceptibility to meropenem. The phenotype conferred by KPC-25 is not known. The signal peptide is underlined and the  $\Omega$ -loop region is boxed, as well as other observed differences in the aminoacidic sequences of related KPC enzymes.
